# Supplementary material for: A new approach to reduced graphite oxide with tetrathiafulvalene in the presence of metal ions
Source: Royal Society of Chemistry journal article supplement (doi:10.1039/c2jm15556g), 2012-01-01
Supplement: c2jm15556g.pdf [file c2jm15556g.pdf]

## Electronic Supplementary Information

### **A new approach to the reduced graphite oxide with tetrathiafulvalene in the presence of metal ions**

Ge Yang, Guanxin Zhang,\* Peng Sheng, Fei Sun, Wei Xu, Deqing Zhang\*

*Beijing National Laboratory, Organic Solids Laboratory, Institute of Chemistry,  
Chinese Academy of Sciences, Beijing 100190, China.*

*E-mail: dqzhang@iccas.ac.cn*

#### **Contents**

- 1. Cyclic voltammograms of GO, TTF and compounds 1 and 2.....S2**
- 2. Microscope images of exfoliated graphite oxide (GO).....S2**
- 3. Absorption spectra of TTF and GO in the presence of different metal ions.....S2-S4**
- 4. ESR spectrum of TTF and GO in the presence of Pb<sup>2+</sup> .....S5**
- 5. Absorption spectra of the ensemble of compound 1 and GO in the presence of Sc<sup>3+</sup> .....S5**
- 6. ESR spectrum of compound 1 and GO in the presence of Sc<sup>3+</sup> .....S5**
- 7. Raman spectra of GO and RGO.....S6**
- 8. Temperature-dependent conductivity of RGO.....S6-S7**
- 9. IR spectra of GO and RGO used KSCN as internal standard.....S8**

### 1. Cyclic voltammograms of GO, TTF and compounds 1 and 2

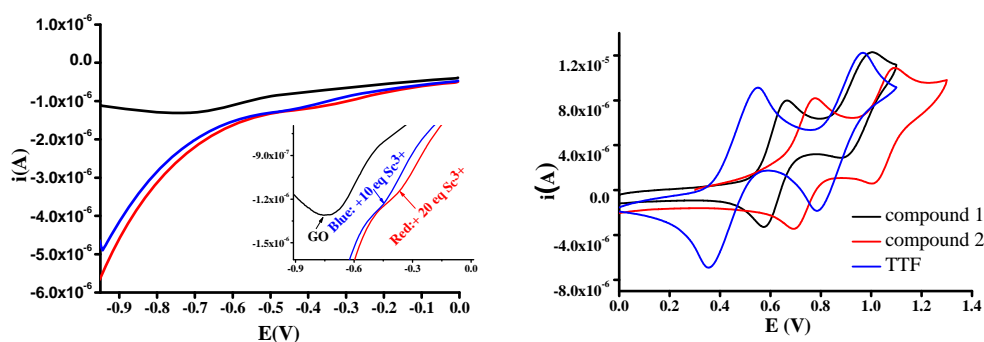

**Figure S1.** (a) The reduction potential of graphite oxide measured with differential pulse voltammetry in the absence and presence of  $\text{Sc}^{3+}$ ; (b) Cyclic voltammograms of TTF and compounds 1 and 2 in the mixture of  $\text{CH}_2\text{Cl}_2$  and DMF (100:1, v:v); Electrochemical measurements were performed in a standard three-electrode cell, with glassy carbon as the working electrode and platinum wire as the counter electrode, and Ag/AgCl electrode (saturated KCl) as the reference electrode,  $n\text{-Bu}_4\text{NPF}_6$  (0.1 M) was used as supporting electrolyte.

### 2. Microscope images of exfoliated graphite oxide (GO)

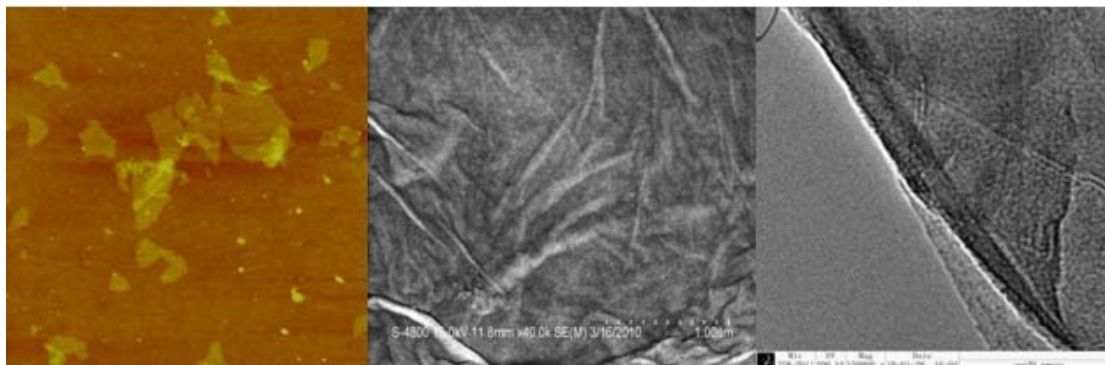

**Figure S2.** Tapping mode AFM (left), SEM (middle), TEM (right) images of exfoliated graphite oxide.

### 3. Absorption spectra of TTF and GO in the presence of different metal ions

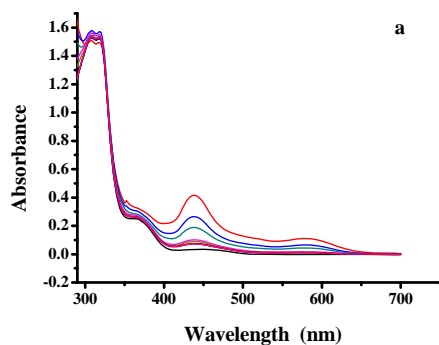

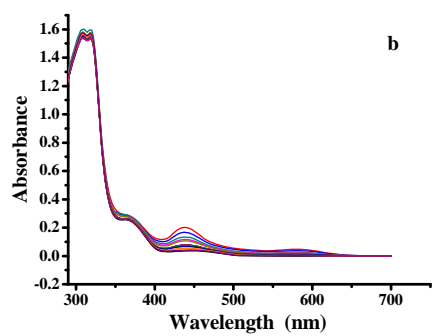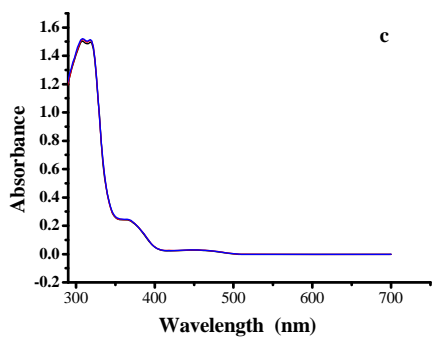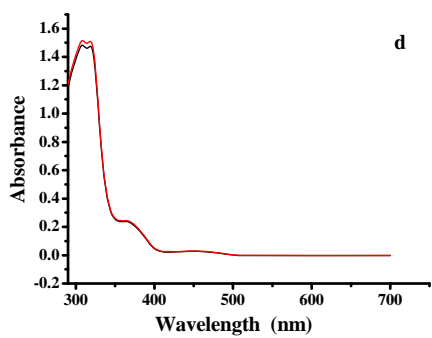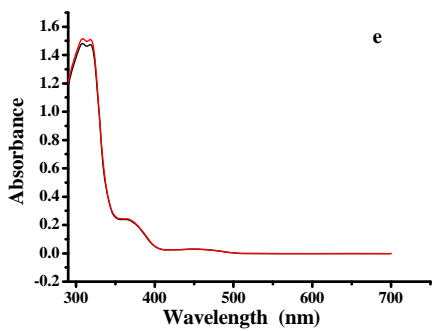

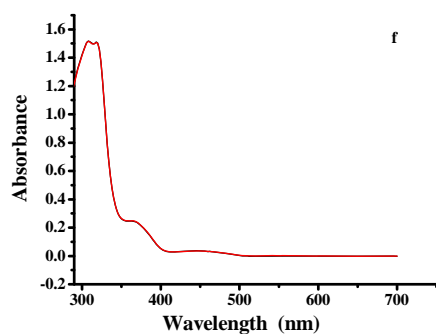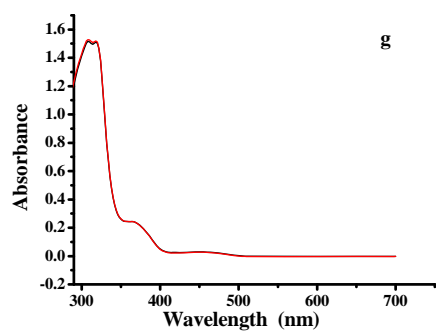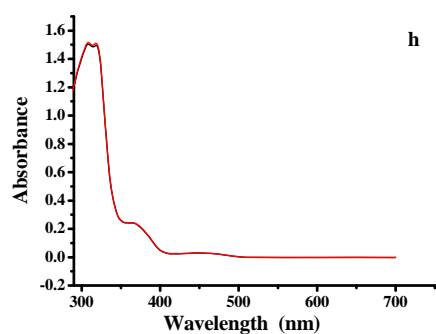

**Figure S3.** The absorption spectra of TTF ( $1.0 \times 10^{-5}$  M) and GO (0.02 mg/mL) in the mixture of CH<sub>2</sub>Cl<sub>2</sub> and DMF (100:1, v:v) after addition of different amounts of Pb<sup>2+</sup> (a), Zn<sup>2+</sup> (b), Na<sup>+</sup> (c), K<sup>+</sup> (d), Cs<sup>+</sup> (e), Mg<sup>2+</sup> (f), Ca<sup>2+</sup> (g), and Ba<sup>2+</sup> (h), respectively; the absorptions due to GO were subtracted in each case.

#### 4. ESR spectrum of TTF and GO in the presence of $\text{Pb}^{2+}$

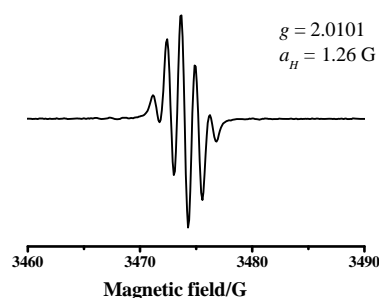

**Figure S4.** ESR spectra of TTF ( $1.0 \times 10^{-5} \text{ M}$ ) and GO (0.02 mg/mL) in the mixture of  $\text{CH}_2\text{Cl}_2$  and DMF (100:1, v:v) in the presence of 5.0 equiv of  $\text{Pb}^{2+}$ ; the spectrum was recorded at room temperature, and the solution was degassed before measurement.

#### 5. Absorption spectra of the ensemble of compound 1 and GO in the presence of $\text{Sc}^{3+}$

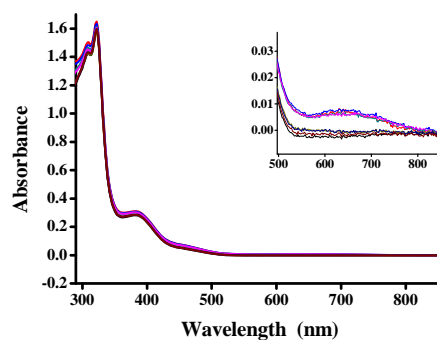

**Figure S5** The absorption spectra of compound 1 ( $1.0 \times 10^{-5} \text{ M}$ ) and GO (0.02 mg/mL) in the mixture of  $\text{CH}_2\text{Cl}_2$  and DMF (100:1, v:v) after addition of different amounts of  $\text{Sc}^{3+}$ ; the absorptions due to GO were subtracted in each case; the inset shows the 500-800 nm part of the absorption spectra in the presence of increasing amounts of  $\text{Sc}^{3+}$ .

#### 6. ESR spectrum of compound 1 and GO in the presence of $\text{Sc}^{3+}$

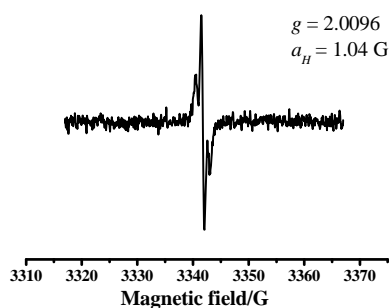

**Figure. S6** ESR spectrum of compound 1 ( $1.0 \times 10^{-5} \text{ M}$ ) and GO (0.02 mg/mL) in the mixture of  $\text{CH}_2\text{Cl}_2$  and DMF (100:1, v:v) in the presence of 5.0 equiv of  $\text{Sc}^{3+}$ ; the spectrum was recorded at room temperature, and the solution was degassed before measurement.

## 7. Raman spectra of GO and RGO

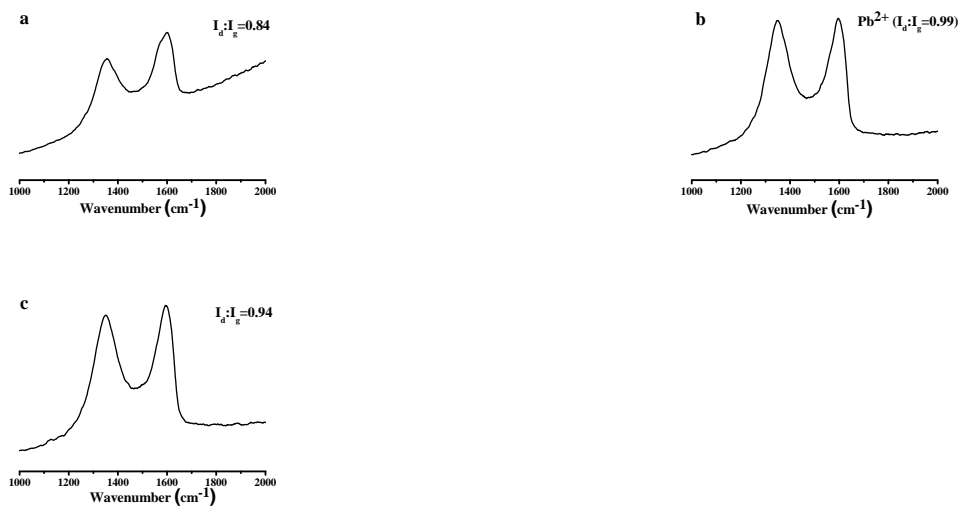

**Figure S7** Raman spectra of GO before (a) and after reduction: (b) with TTF +  $\text{Pb}^{2+}$ , (c) compound **1** +  $\text{Sc}^{3+}$ .

## 8. Temperature-dependent conductivity of RGO

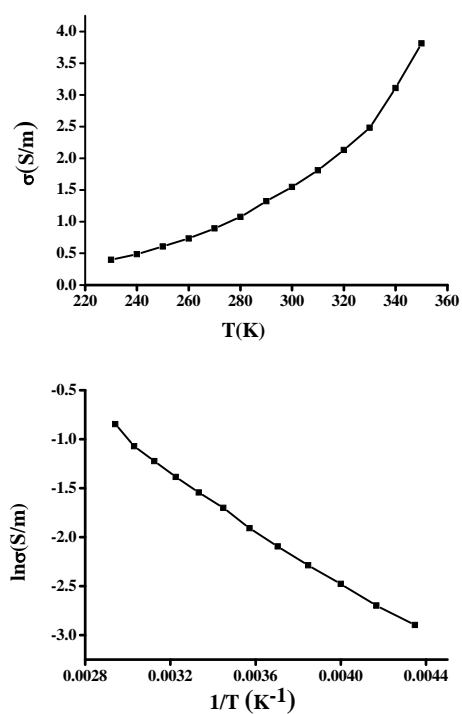

**Figure S8** The variation of conductivity of RGO from the reduction of GO with TTF in the presence of  $\text{Sc}^{3+}$  vs. temperature.

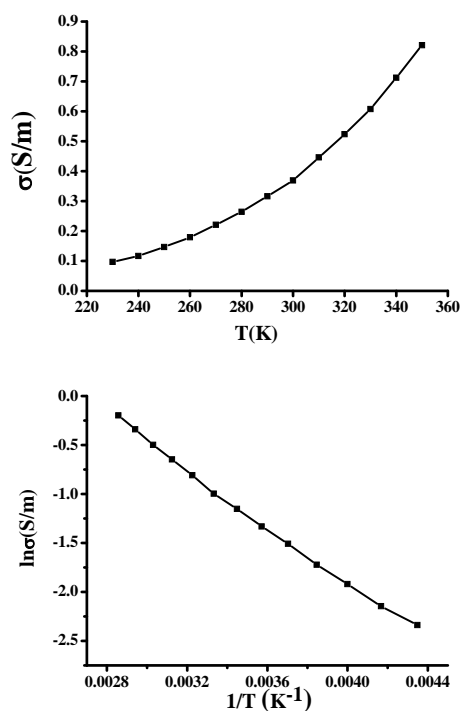

**Figure S9** The variation of conductivity of RGO from the reduction of GO with TTF in the presence of  $\text{Pb}^{2+}$  vs. temperature.

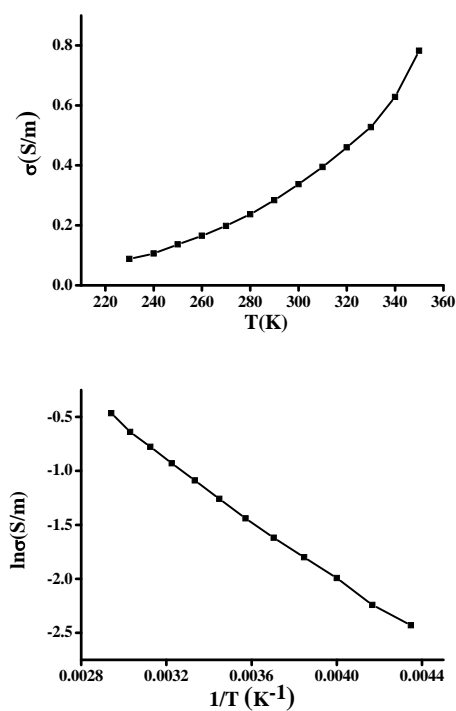

**Figure S10** The variation of conductivity of RGO from the reduction of GO with compound **1** in the presence of  $\text{Sc}^{3+}$  vs. temperature.

## 9. IR spectra of GO and RGO used KSCN as internal standard

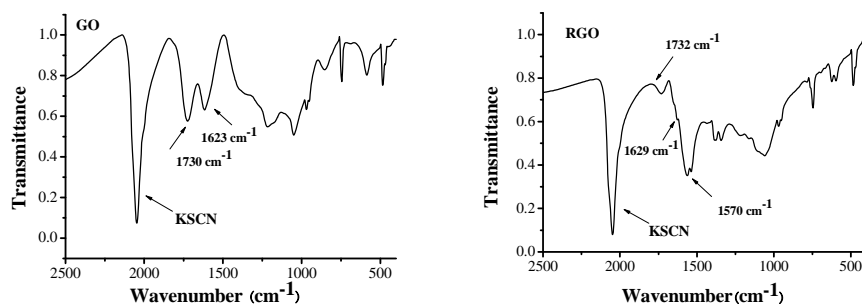

**Figure S11** (*left*) IR spectrum of the compressed platelet of GO, KSCN and KBr; (*right*) IR spectrum of the compressed platelet of RGO, KSCN and KBr; for each case the same amount of KSCN, KBr and RGO/GO were used.
